# Supplementary material for: 2-D lanthanide–organic complexes constructed from 6,7-dihydropyrido(2,3-d)pyridazine-5,8-dione: synthesis, characterization and photoluminescence for sensing small molecules
Source: Royal Society of Chemistry journal article supplement (doi:10.1039/c3ce42575d), 2014-01-01
Supplement: c3ce42575d1.pdf [file c3ce42575d1.pdf]

## Supporting Information

# 2-D lanthanide organic networks constructed from 6,7-dihydropyrido(2,3-d) pyridazine-5,8-dione: Synthesis, characterization and photoluminescence for sensing small molecules

Waqar Ahmad, Lijuan Zhang\*, Yunshan Zhou\*

State Key Laboratory of Chemical Resource Engineering, Institute of Science, Beijing University of Chemical Technology, Beijing 100029, P. R. China

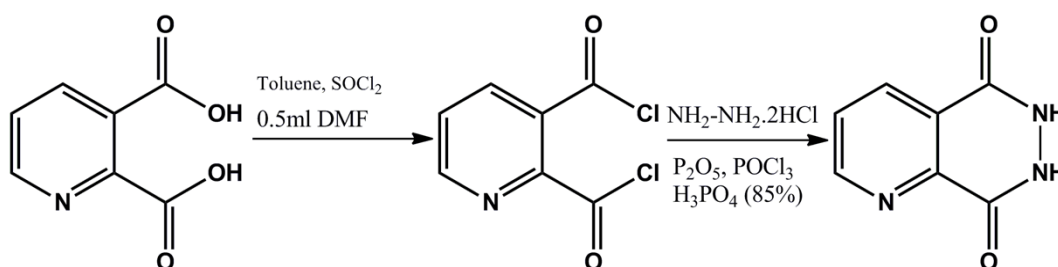

Scheme S1 Synthesis of H<sub>2</sub>PDH.

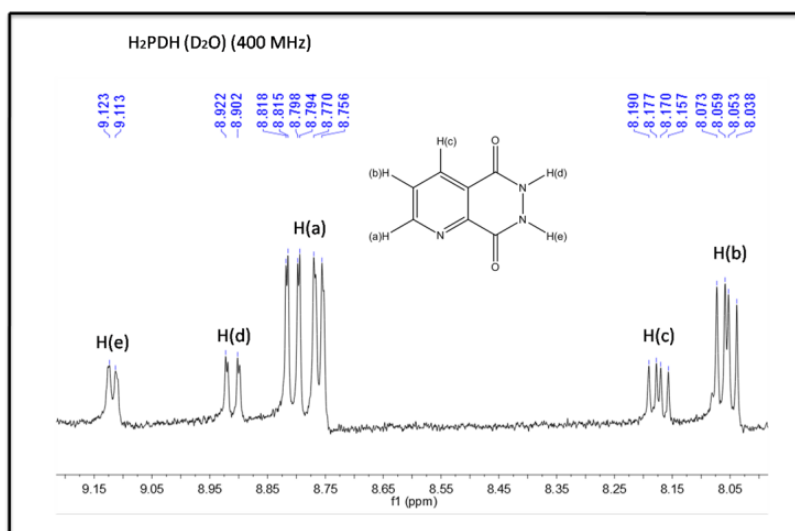

Figure S1. <sup>1</sup>H NMR spectrum of 6, 7-dihydropyrido(2, 3-*d*)pyridazine-5, 8-dione (H<sub>2</sub>PDH) ligand at 400MHz by using D<sub>2</sub>O as solvent.

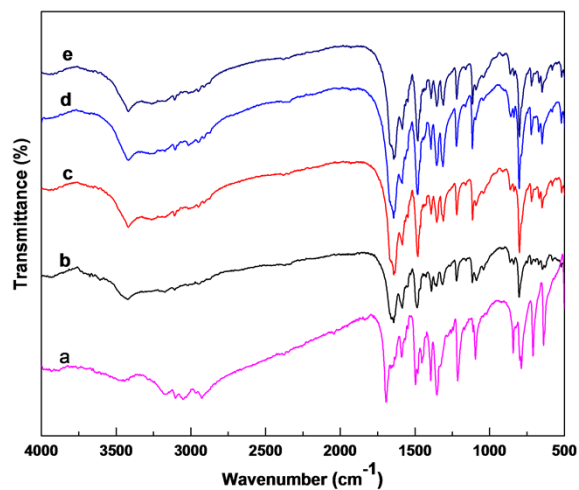

**Figure S2.** IR spectra of 6,7-dihydropyrido(2,3-d)pyridazine-5,8-dione (H<sub>2</sub>PDH) (a), [Eu(HPDH)(ox)(H<sub>2</sub>O)] **1** (b), [Tb(HPDH)(ox)(H<sub>2</sub>O)] **2** (c), [Sm(HPDH)(ox)(H<sub>2</sub>O)] **3** (d), [Gd(HPDH)(ox)(H<sub>2</sub>O)] **4** (e).

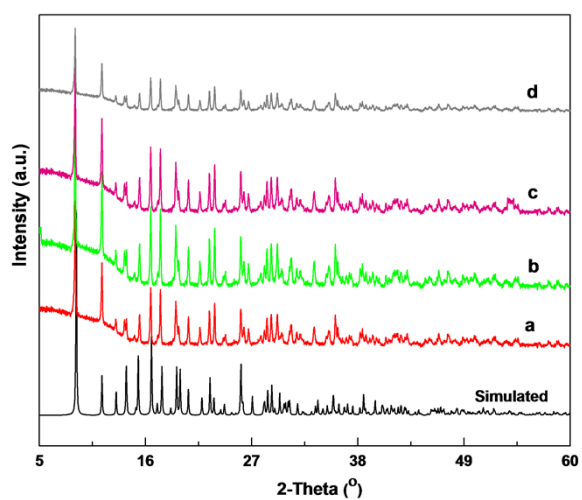

**Figure S3.** Experimental X-ray powder diffraction (XRD) patterns of complex **1**(a), complex **2**(b), complex **3**(c), complex **4**(d) and the simulated XRD pattern of complex **1**.

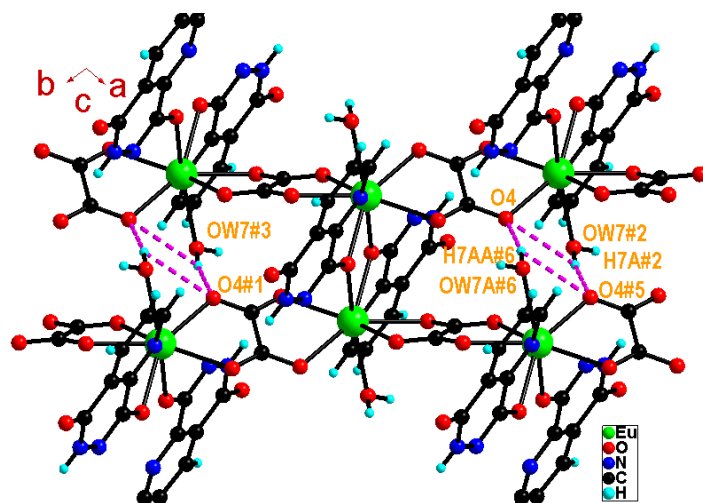

**Figure S4.** The inter and intra 2D layer hydrogen bonding in 3D network in complex 1 (the broken red lines). #1 =  $1-x, 2-y, 2-z$ , #2 =  $1-x, 1-y, 2-z$ , #3 =  $-x, 2-y, 2-z$ , #4 =  $1+x, -1+y, 2-z$ , #5 =  $2-x, 1-y, 2-z$ , #6 =  $1+x, y, z$ .

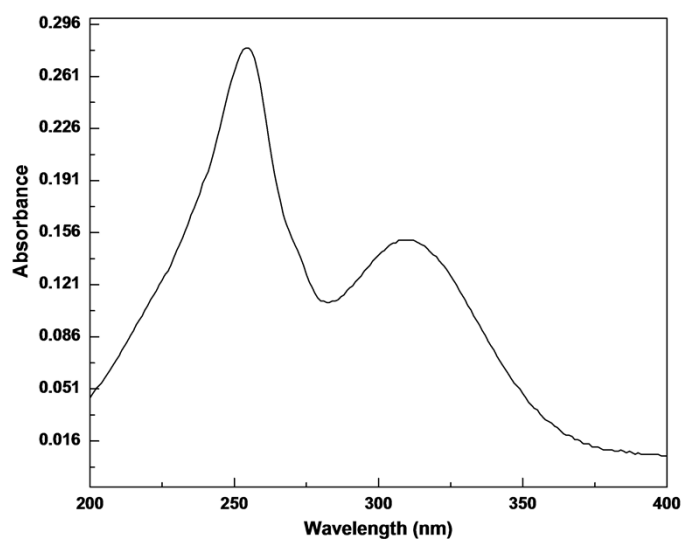

**Figure S5.** The UV spectrum of free  $H_2PDH$  ligand in ethanol (concentration =  $1 \times 10^{-4}$  M).

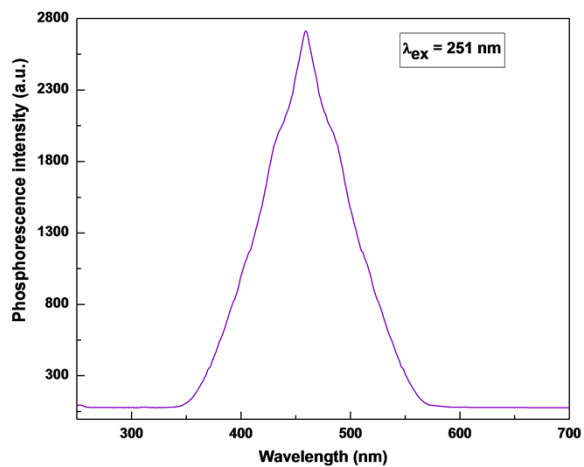

Figure S6. The Phosphorescence spectrum of  $[\text{Gd}(\text{HPDH})(\text{ox})(\text{H}_2\text{O})]$  **4** at 77 K at  $\lambda_{\text{exc}} = 251 \text{ nm}$ .

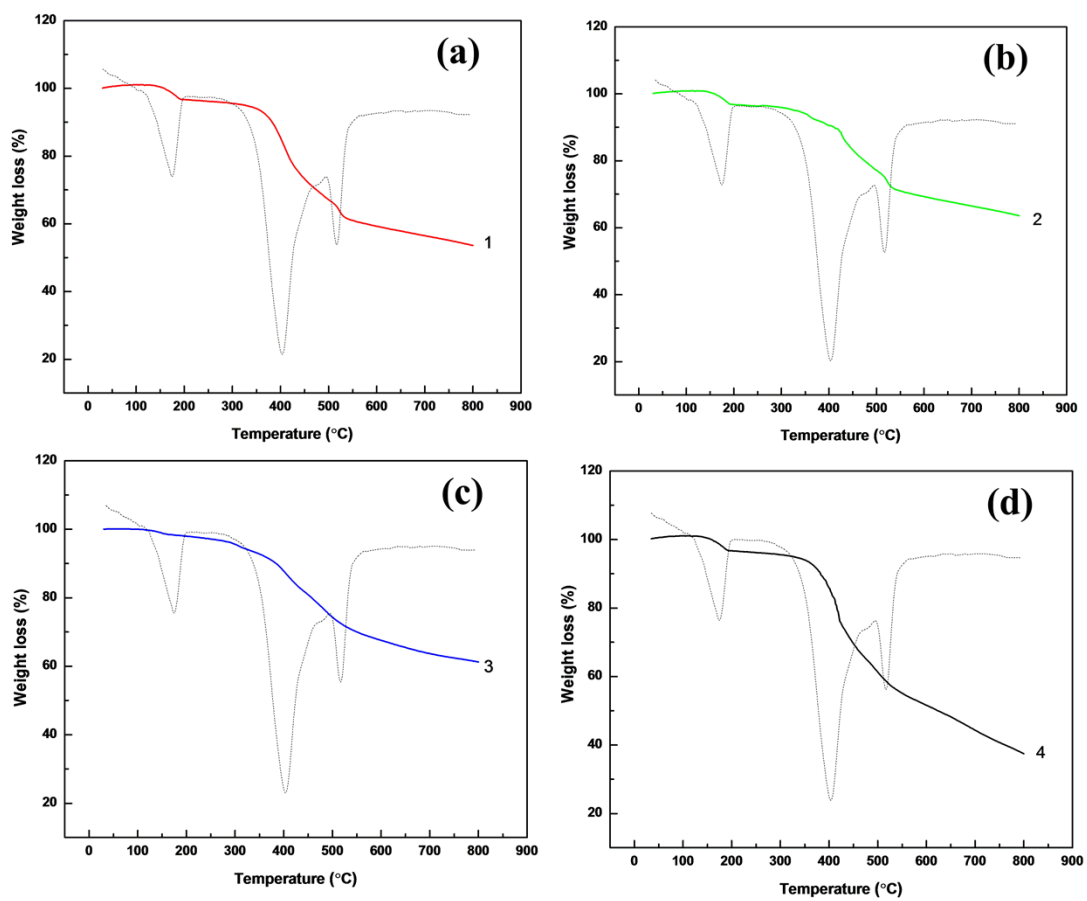

Figure S7. TG and DTA curves for complexes **1** (a), **2** (b), **3** (c), and **4** (d).

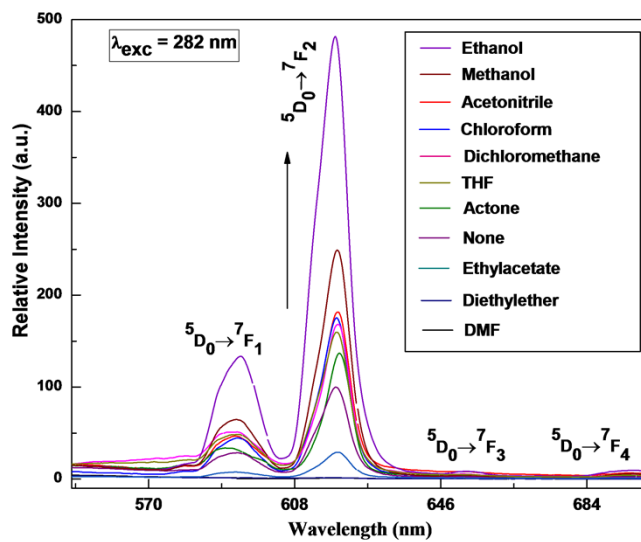

**Figure S8.** The PL spectra of complex **1**-solvent emulsions in different solvents at excitation wavelength of 282 nm.

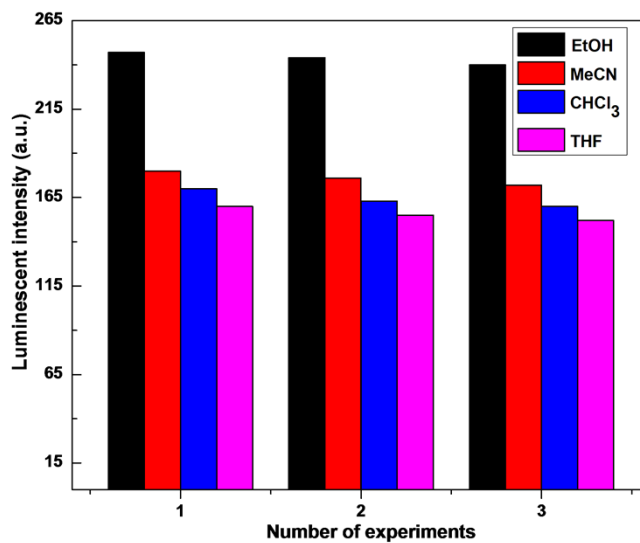

**Figure S9.** Reproduce ability of the quenching ability of complex **1** dispersed in EtOH, MeCN, CHCl<sub>3</sub> and THF solutions.

**Table S1** Dielectric constant, Coordination ability and Reichard's solvent polarity parameters.

| Solvent                                         | K     | a    | $E_T^N$ |
|-------------------------------------------------|-------|------|---------|
| EtOH                                            | 24.6  | -0.1 | 0.654   |
| MeOH                                            | 32.6  | 0    | 0.762   |
| MeCN                                            | 37.5  | -0.7 | 0.460   |
| CHCl <sub>3</sub>                               | 4.81  | 1.4  | 0.259   |
| CH <sub>2</sub> Cl <sub>2</sub>                 | 9.08  | -0.6 | 3.1     |
| THF                                             | 7.6   | 0.4  | 0.207   |
| (C <sub>2</sub> H <sub>5</sub> ) <sub>2</sub> O | 4.34  | -0.9 | 0.117   |
| None(H <sub>2</sub> O)                          | 78.54 | 0.6  | 1.0     |
| EtOAc                                           | 6.02  | -0.8 | 0.228   |
| (CH <sub>3</sub> ) <sub>2</sub> O               | 20.7  | -0.5 | 0.355   |
| DMF                                             | 36.7  | 0.8  | 0.386   |

Dielectric constant =  $K$ , Coordination ability =  $a$ , Dimroth–Reichardt =  $E_T^N$
